# Supplementary material for: Engaging people with lived experiences on community advisory boards in community-based participatory research: a scoping review protocol
Source: HighWire-hosted journal article supplement (doi:10.1136/bmjopen-2023-078479), 2024-03-01
Supplement: bmjopen-2023-078479supp002_data_supplement.pdf [file bmjopen-2023-078479supp002_data_supplement.pdf]

## Appendix B

List of Grey Literature that have influenced I-CREAt: Published Reports from Universities as well as Canadian and Key International Organizations.

| Initiative/Report                                                                                         | Institution/Organization                         | Classification             | Link                                                                                                                                                                                                  |
|-----------------------------------------------------------------------------------------------------------|--------------------------------------------------|----------------------------|-------------------------------------------------------------------------------------------------------------------------------------------------------------------------------------------------------|
| Participatory Research at McGill (PRAM)                                                                   | McGill University                                | Canadian University        | <a href="https://pram.ca/home/">https://pram.ca/home/</a>                                                                                                                                             |
| Community-Based Research Modules                                                                          | Trent University                                 | Canadian University        | <a href="https://www.trentu.ca/community-based-research/cbr-modules/community-based-research-modules">https://www.trentu.ca/community-based-research/cbr-modules/community-based-research-modules</a> |
| Access Alliance Multicultural Health and Community Services                                               | Access Alliance (Not-for profit)                 | Canadian Organization      | <a href="https://accessalliance.ca/">https://accessalliance.ca/</a>                                                                                                                                   |
| Community-Based Participatory Research Kit (GOAL Youth Workshop Series)                                   | ArtReach Toronto                                 | Canadian Organization      | <a href="https://www.artreach.org/">https://www.artreach.org/</a>                                                                                                                                     |
| Community-Based Research Toolkit: Resources and Tools for Doing Research with Community for Social Change | Access Alliance (Not-for profit)                 | Canadian Organization      | <a href="https://accessalliance.ca/wp-content/uploads/2020/07/CBR_Toolkit_1_Jan2012.pdf">https://accessalliance.ca/wp-content/uploads/2020/07/CBR_Toolkit_1_Jan2012.pdf</a>                           |
| Community-Based Research                                                                                  | Community-Based Research Canada (Not-for profit) | Canadian Organization      | <a href="https://www.communityresearchcanada.ca/">https://www.communityresearchcanada.ca/</a>                                                                                                         |
| Centre for Community Based Research (CCBR)                                                                | University of Waterloo                           | Canadian University        | <a href="https://www.communitybasedresearch.ca/our-approach">https://www.communitybasedresearch.ca/our-approach</a>                                                                                   |
| Canadian Lived Experience Leadership Network                                                              | The Canadian Alliance to End Homelessness (CAEH) | Canadian Organization      | <a href="https://caeh.ca/lived-leadership-network-launch/">https://caeh.ca/lived-leadership-network-launch/</a>                                                                                       |
| Community-Based Research Toolkit                                                                          | Community-Based Research Centre (CBRC)           | Canadian Organization      | <a href="https://www.cbrc.net/">https://www.cbrc.net/</a>                                                                                                                                             |
| Participatory action research (PAR) Toolkit                                                               | Australian Institute of Family Studies           | International Organization | <a href="https://aifs.gov.au/resources/practice-guides/participatory-action-research">https://aifs.gov.au/resources/practice-guides/participatory-action-research</a>                                 |
| Voices of Youth in Chicago Education (VOYCE) project                                                      | Voices of Youth in Chicago Education (VOYCE)     | International Organization | <a href="https://voyceproject.org/about-us/">https://voyceproject.org/about-us/</a>                                                                                                                   |
